# Supplementary material for: Case Report: Chemotherapy Indication in a Case of Neurofibromatosis Type 1 Presenting Optic Pathway Glioma: A One-Year Clinical Case Study Using Differential Tractography Approach
Source: Front Hum Neurosci. 2021 Apr 6;15:620439. doi: 10.3389/fnhum.2021.620439 (PMC8115022; doi:10.3389/fnhum.2021.620439)
Supplement: Supplementary Table 4 — Statistical analyses between patient and normal ORs dMRI metrics performed in five stages including 3 months post-operation vs. pre-operation (A), post-chemotherapy relative to 3 months post-operation (B), pre-operation vs. pre-chemotherapy (C), post-chemotherapy vs. pre-chemotherapy (D), and post-chemotherapy relative to pre-operation (E). Statistics performed by two-tailed sample t-test, *P < 0.05; **P < 0.01; ***P < 0.001; ****P < 0.0001. OR, optic radiation; dMRI, diffusion magnetic resonance imaging. [file Table_4.XLSX]

## Sheet: Sheet1
			Mean ± SD			95.0% confidence interval for Mean
			Patient	Normal subjects		standard error of difference	Lower boundary	Upper boundary	t-value	P-value
A	Left Optic Radiation	FA	0.4492 ± 0.1572	0.5896 ± 0.0788		0.033	-0.205272	-0.074328	5.23	<0.00001
		MD	0.7577 ± 0.0351	0.7864 ± 0.0242		0.008	-0.043896	-0.013504	3.75	<0.0001
		RD	0.4469 ± 0.0638	0.4832 ± 0.0631		0.015	-0.06605	-0.00655	2.42	0.017
		AD	1.3793 ± 0.0737	1.3928 ± 0.0764		0.006	0.0011	0.0259	2.13	0.033
	Right Optic Radiation	FA	0.583 ± 0.1242	0.5527 ± 0.1353		0.021	-0.0719	0.0113	-1.439	0.1523
		MD	0.7958 ± 0.0374	0.8012 ± 0.0542		0.008	-0.0095	0.0203	0.717	0.4748
		RD	0.4888 ± 0.0828	0.5148 ± 0.1004		0.015	-0.0035	0.0555	1.744	0.0832
		AD	1.4098 ± 0.1805	1.3740 ± 0.1746		0.029	-0.0927	0.0211	-1.242	0.216
B	Left Optic Radiation	FA	0.5475 ± 0.1219	0.5896 ± 0.0788		0.029	-0.0166	0.1008	1.442	0.15
		MD	0.8837 ± 0.1584	0.7864 ± 0.0242		0.029	-0.1543	-0.0403	-3.391	0.001
		RD	0.6850 ± 0.2356	0.4832 ± 0.0631		0.045	-0.2926	-0.111	-4.45	< 0.0001
		AD	1.4386 ± 0.1617	1.3928 ± 0.0764		0.034	-0.1132	0.0216	-1.351	0.18
	Right Optic Radiation	FA	0.5718 ± 0.0855	0.5527 ± 0.1353		0.02	-0.0596	0.0214	-0.933	0.3525
		MD	0.7732 ± 0.0463	0.8012 ± 0.0542		0.009	0.0103	0.0457	3.128	0.0022
		RD	0.5481 ± 0.1331	0.5148 ± 0.1004		0.02	-0.0735	0.0069	-1.639	0.1036
		AD	1.3412 ± 0.1179	1.3740 ± 0.1746		0.027	-0.0203	0.0859	1.222	0.224
C	Left Optic Radiation	FA	0.6902 ± 0.1164	0.5896 ± 0.0788		0.024	0.149	0.0522	4.139	0.0001
		MD	0.7443 ± 0.0613	0.7864 ± 0.0242		0.012	-0.019	-0.0652	3.628	0.0005
		RD	0.3828 ± 0.1061	0.4832 ± 0.0631		0.022	-0.0568	-0.144	4.59	< 0.0001
		AD	1.4673 ± 0.1777	1.3928 ± 0.0764		0.034	0.1421	0.0069	2.195	0.0313
	Right Optic Radiation	FA	0.5370 ± 0.1321	0.5527 ± 0.1353		0.02	-0.0247	0.0561	0.767	0.4444
		MD	0.8250 ± 0.0704	0.8012 ± 0.0542		0.01	-0.0432	-0.0044	-2.428	0.0162
		RD	0.5433 ± 0.1206	0.5148 ± 0.1004		0.017	-0.0625	0.0055	-1.654	0.0999
		AD	1.3885 ± 0.1508	1.3740 ± 0.1746		0.025	-0.0634	0.0344	-0.585	0.5592
D	Left Optic Radiation	FA	0.5566 ± 0.1290	0.5896 ± 0.0788		0.026	-0.0179	0.0839	1.288	0.2
		MD	0.8409 ± 0.0666	0.7864 ± 0.0242		0.012	-0.0791	-0.0299	-4.403	< 0.0001
		RD	0.4525 ± 0.0473	0.4832 ± 0.0631		0.014	-0.0033	-0.0581	-2.242	0.0285
		AD	1.4402 ± 0.1262	1.3928 ± 0.0764		0.025	-0.0964	0.0016	-1.92	0.058
	Right Optic Radiation	FA	0.5679 ± 0.1497	0.5527 ± 0.1353		0.028	-0.0701	0.0397	-0.549	0.5844
		MD	0.7748 ± 0.0525	0.8012 ± 0.0542		0.026	0.0054	0.0474	2.494	0.0141
		RD	0.4795 ± 0.0702	0.5148 ± 0.1004		0.018	-0.0004	0.071	1.959	0.0526
		AD	1.3654 ± 0.2486	1.3740 ± 0.1746		0.04	-0.0707	0.0879	0.215	0.8303
E	Left Optic Radiation	FA	0.6303 ± 0.0444	0.5896 ± 0.0788		0.015	0.0099	0.0715	2.639	0.0104
		MD	0.7682 ± 0.0541	0.7864 ± 0.0242		0.006	-0.0302	-0.0062	-2.98	0.0032
		RD	0.4525 ± 0.0473	0.4832 ± 0.0631		0.014	-0.0581	-0.0033	-2.242	0.0285
		AD	1.3994 ± 0.1212	1.3928 ± 0.0764		0.025	-0.057	0.0438	-0.262	0.7945
	Right Optic Radiation	FA	0.5857 ± 0.0826	0.5527 ± 0.1353		0.018	-0.0694	0.0034	-1.794	0.0749
		MD	0.7984 ± 0.0812	0.8012 ± 0.0542		0.011	-0.0195	0.0251	0.248	0.8046
		RD	0.4974 ± 0.0991	0.5148 ± 0.1004		0.016	-0.0149	0.0497	1.065	0.2888
		AD	1.4004 ± 0.1289	1.3740 ± 0.1746		0.025	-0.0761	0.0233	-1.049	0.296
